# Supplementary material for: Characterization of a novel reassortment Tibet orbivirus isolated from Culicoides spp. in Yunnan, PR China
Source: PubMed Central journal article supplement (PMC8567429; doi:10.1099/jgv.0.001645), 2021-09-08
Supplement: jgv-102-1645-s001.pdf [file jgv-102-1645-s001.pdf]

**Table S1:** Different cell growth under MOI=1

|         | The day 1                                                                           | The day 4                                                                           | The day 7                                                                             |
|---------|-------------------------------------------------------------------------------------|-------------------------------------------------------------------------------------|---------------------------------------------------------------------------------------|
| BHK-21  |    |    |    |
| Vero-E6 |    |    |    |
| SW13    |   |   |   |
| Huh 7   |  |  |  |
| C6/36   |  |  |  |
| Aag 2   |  |  |  |
| MDBK    |  |  |  |

**Table S2:** Different cell growth under MOI=0.01

|         | The day 1                                                                           | The day 4                                                                           | The day 7                                                                             |
|---------|-------------------------------------------------------------------------------------|-------------------------------------------------------------------------------------|---------------------------------------------------------------------------------------|
| BHK-21  |    |    |    |
| Vero-E6 |    |    |    |
| SW13    |   |   |   |
| Huh 7   |  |  |  |
| C6/36   |  |  |  |
| Aag 2   |  |  |  |
| MDBK    |  |  |  |

**Table S3:** Different cell growth under MOI=0.0001

|         | The day 1                                                                           | The day 4                                                                           | The day 7                                                                             |
|---------|-------------------------------------------------------------------------------------|-------------------------------------------------------------------------------------|---------------------------------------------------------------------------------------|
| BHK-21  |    |    |    |
| Vero-E6 |    |    |    |
| SW13    |   |   |   |
| Huh 7   |  |  |  |
| C6/36   |  |  |  |
| Aag 2   |  |  |  |
| MDBK    |  |  |  |

**Table S4:** Different cell growth as MOCK

|         | The day 1                                                                           | The day 4                                                                           | The day 7                                                                             |
|---------|-------------------------------------------------------------------------------------|-------------------------------------------------------------------------------------|---------------------------------------------------------------------------------------|
| BHK-21  |    |    |    |
| Vero-E6 |    |    |    |
| SW13    |   |   |   |
| Huh 7   |  |  |  |
| C6/36   |  |  |  |
| Aag 2   |  |  |  |
| MDBK    |  |  |  |

**Table S5:** Different cell growth under MOI=5

|       | The day 1                                                                         | The day 4                                                                         | The day 7                                                                           |
|-------|-----------------------------------------------------------------------------------|-----------------------------------------------------------------------------------|-------------------------------------------------------------------------------------|
| Huh 7 | 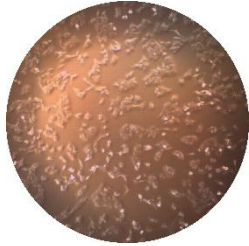 |  |  |
| MDBK  |  |  |  |

**Table S6:** Different cell growth under MOI=10

|       | The day 1                                                                           | The day 4                                                                           | The day 7                                                                             |
|-------|-------------------------------------------------------------------------------------|-------------------------------------------------------------------------------------|---------------------------------------------------------------------------------------|
| Huh 7 |   |   |   |
| MDBK  |  |  |  |
